# Supplementary material for: Pericyte MyD88 and IRAK4 control inflammatory and fibrotic responses to tissue injury
Source: JCI journal article supplement (doi:10.1172/jci87532), 2016-11-20

## Supplemental Data

### **Pericyte MyD88 controls inflammatory and fibrotic responses to tissue injury**

Irina A. Leaf<sup>1,2</sup>, Shunsaku Nakagawa<sup>3</sup>, Bryce G. Johnson<sup>1,3</sup>, Jin Joo Cha<sup>3</sup>, Kristen Mittelsteadt<sup>3</sup>, Kevin M. Guckian<sup>1</sup>, Ivan G. Gomez<sup>1,3</sup>, William A. Altemeier<sup>3</sup>, Jeremy S. Duffield<sup>1,3</sup> \*

1. Supplemental Figures
2. Supplemental Tables

# Supplementary Fig.1

Mouse and human pericytes respond to TLR ligands, kidney DAMPs and histones

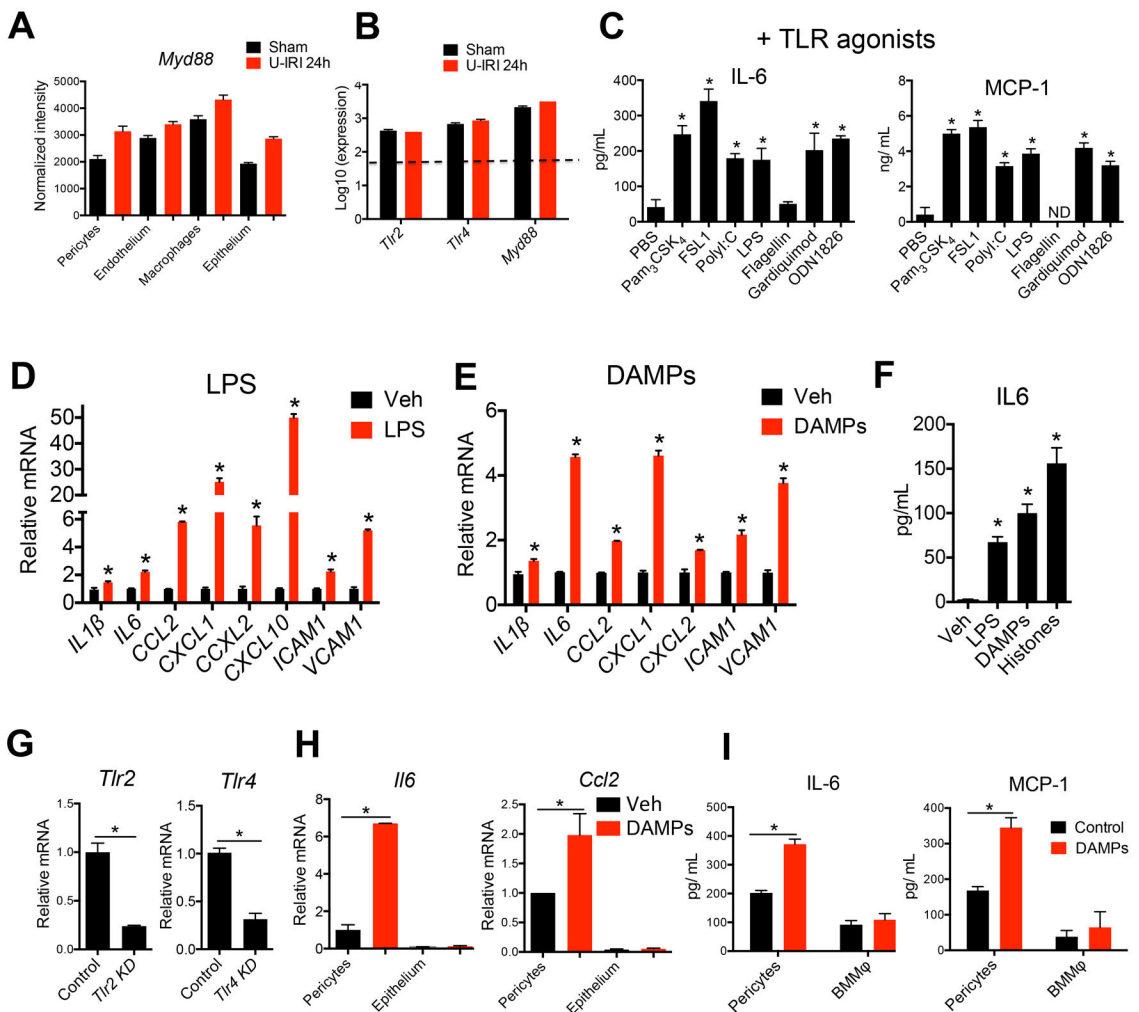

(A-B) MyD88 expression by 4 different cell types in the kidney in vivo (A) and TLR2, TLR4 and MyD88 expression in kidney pericytes (B) in vivo isolated by TRAP and detected by microarray. Dotted line designates the level of detection. (C) IL6 or MCP1 secretion by mouse kidney pericytes in response to different TLR ligands (D) Transcriptional response to LPS or (E) kidney DAMPs by human pericytes. (F) Secretion of IL-6 by human pericytes in response to LPS, kidney DAMPs or histones. (G) Transcript levels for TLR2 and TLR4 48h following specific or scrambled siRNA (H) Transcript levels for *Il6* and *Ccl2* in pericytes and primary mouse proximal epithelium in control and DAMPs activated conditions. (I) Secretion of IL-6 and MCP-1 by kidney pericytes or Bone marrow derived macrophages in culture in response to kidney DAMPs. (n = 3-5/group; \**P* < 0.05; 2 tailed Student's t-test or ANOVA with Bonferroni's correction).

Supplementary Fig.2  
Characterization of DAMPs

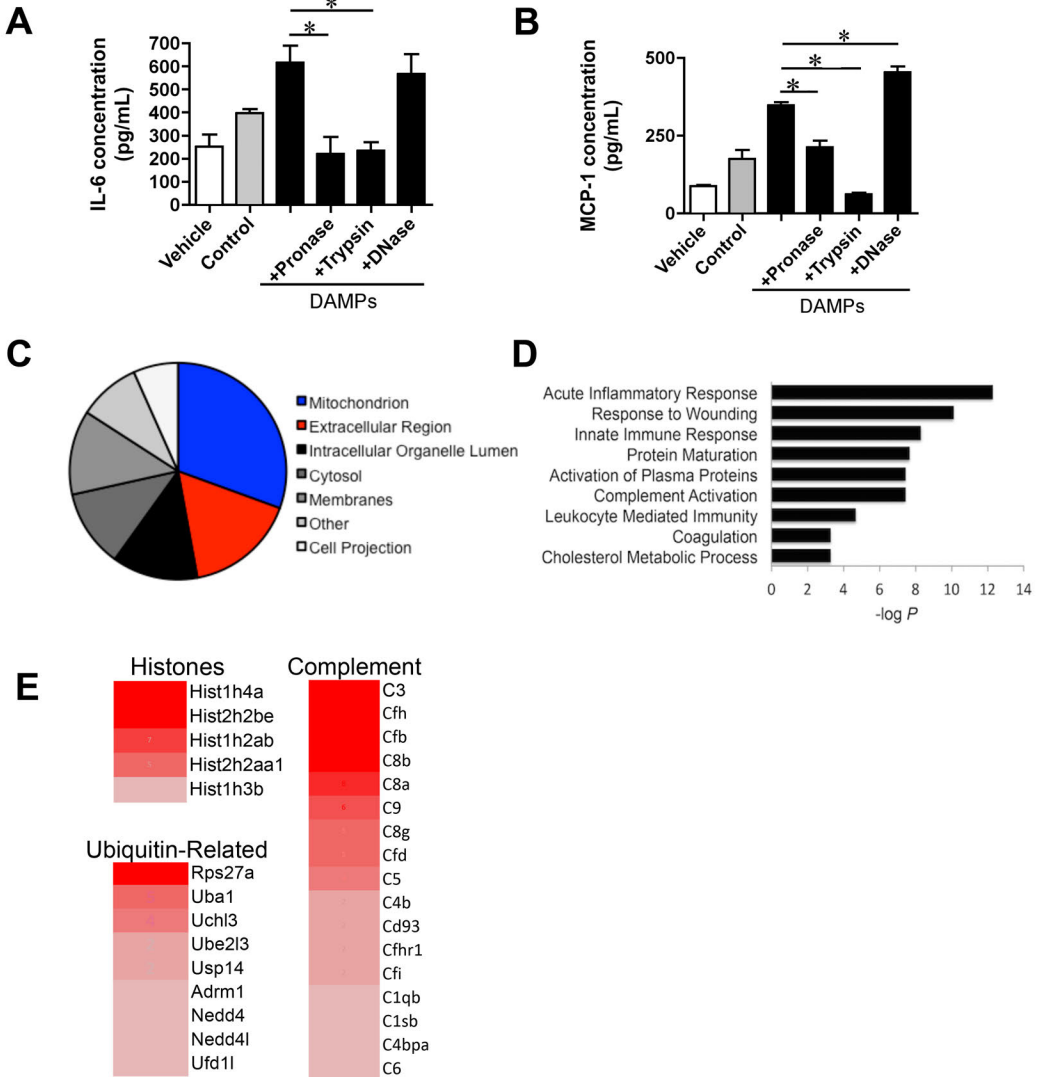

(A,B) Secretion of IL-6 and MCP-1 by kidney pericytes in culture in response to kidney DAMPs following pre-treatment with nucleases or proteinases. (C) Composition of kidney IRI DAMPs by cellular compartment. (D) Pathways enriched in kidney IRI DAMPs. (E) Most enriched protein groups (n = 3-6/group; \* P < 0.05, one way ANOVA with Bonferroni's correction).

Supplementary Fig.3  
Role of *Il1* & *Il1r1* in pericytes

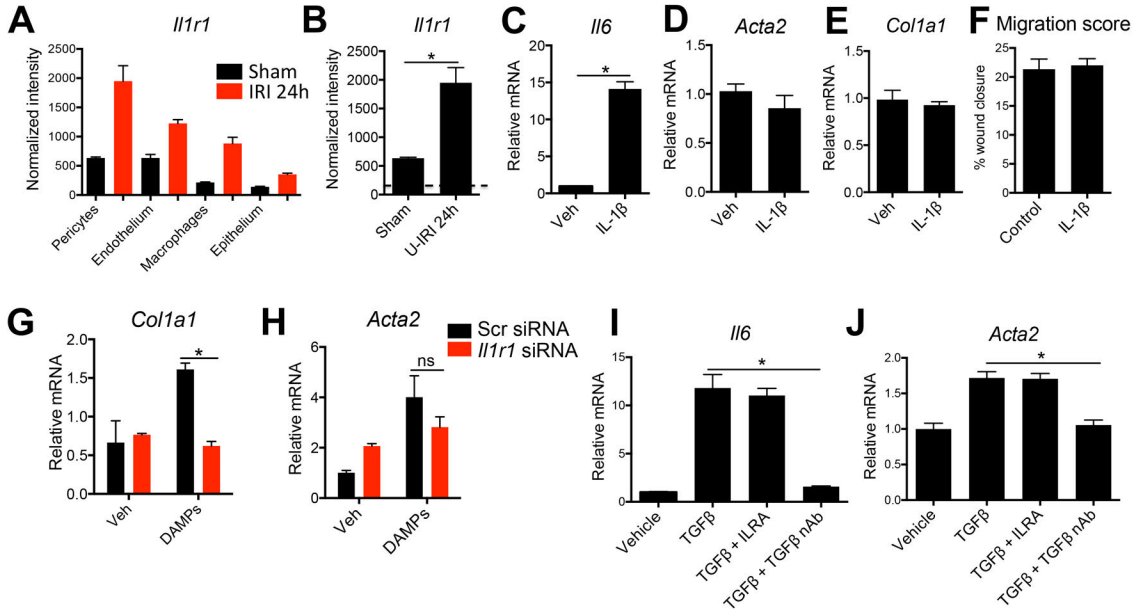

(A-B) Expression of *Il1r1* in multiple cell types (A) and specifically in kidney pericytes (B) *in vivo* purified by TRAP and analyzed by microarray in healthy or 24h post-IRI kidneys. Dotted line designates the level of detection.

(C-E) Expression of *Il6*, *Acta2* and *Col1a1* in pericytes treated with IL-1 $\beta$  for 24 hours.

(F) Migration of kidney pericytes in response to IL-1 $\beta$  at 24 hours. (G-H) Impact of scrambled or *Il1r1*-specific siRNA on pericyte levels of *Col1a1* or *Acta2* transcripts 24 hours after treatment with either vehicle or DAMPs.

(I-J) Impact of IL1RA or anti-TGF $\beta$  antibody on levels of *Il6* or *Acta2*, 24 hours after treatment with TGF $\beta$ . (n = 3-5/group; \*P < 0.05; 2 tailed Student's t-test or one way ANOVA with Bonferroni's correction).



## Supplementary Fig.4

Human kidney pericytes respond to TGF $\beta$ , kidney DAMPs or histones and this response is controlled by MYD88

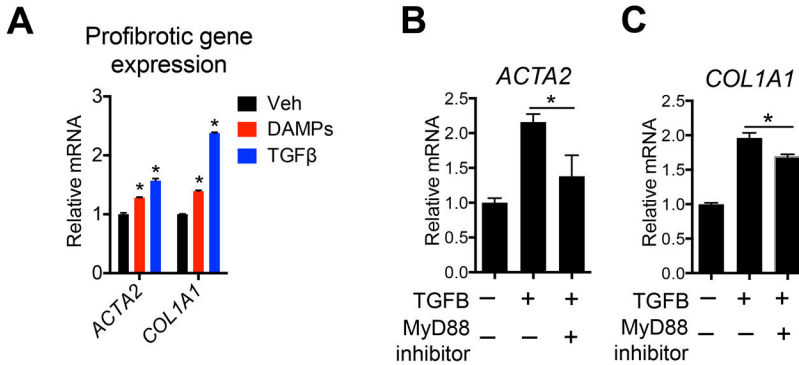

(A) Expression of myofibroblast differentiation markers *ACTA2* and *COL1A1* in response to TGF $\beta$  or kidney DAMPs. (B-C) Transcription of *ACTA2* and *COL1A1* following TGF $\beta$  and MYD88 inhibitor treatments. (n = 3/group; \* P < 0.05, 2 tailed Student's t-test or one way ANOVA with Bonferroni's correction).

Supplementary Fig. 5

Crosstalk between TLR2/4 and MYD88 profibrotic signaling occurring at the receptor level but not by regulating *Bambi* or *Smad7*

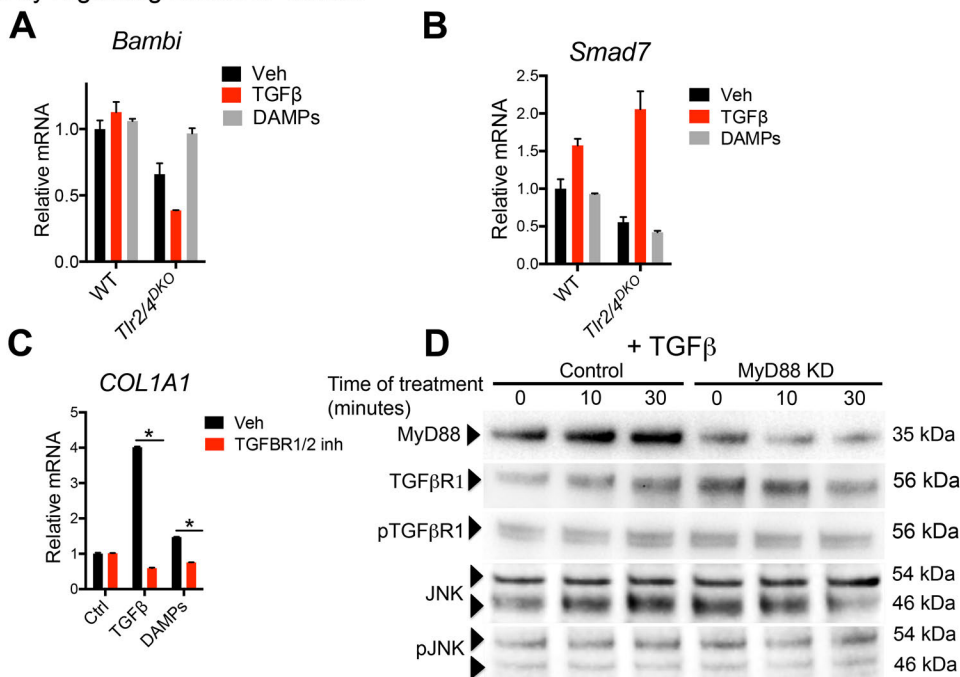

(A-B) Transcription of *Bambi* and *Smad7* in mouse kidney pericytes stimulated with TGFβ or kidney DAMPs for 24 hours. (C) Effect of TGFβR1/2 inhibitor on TGFβ and DAMPs mediated expression of *COL1A1* in human pericytes (D) Western blotting with MyD88, TGFβR1, pTGFβR1, JNK or pJNK antibodies showing the effect of TGFβ treatment on control (scrambled siRNA) or MyD88 knock-down mouse kidney pericytes. (n = 3/group; \* P < 0.05; 2-tailed Student's t-test).

## Supplementary Figure 6

### Generation and characterization of the mouse strain with pericyte-specific deletion of MyD88

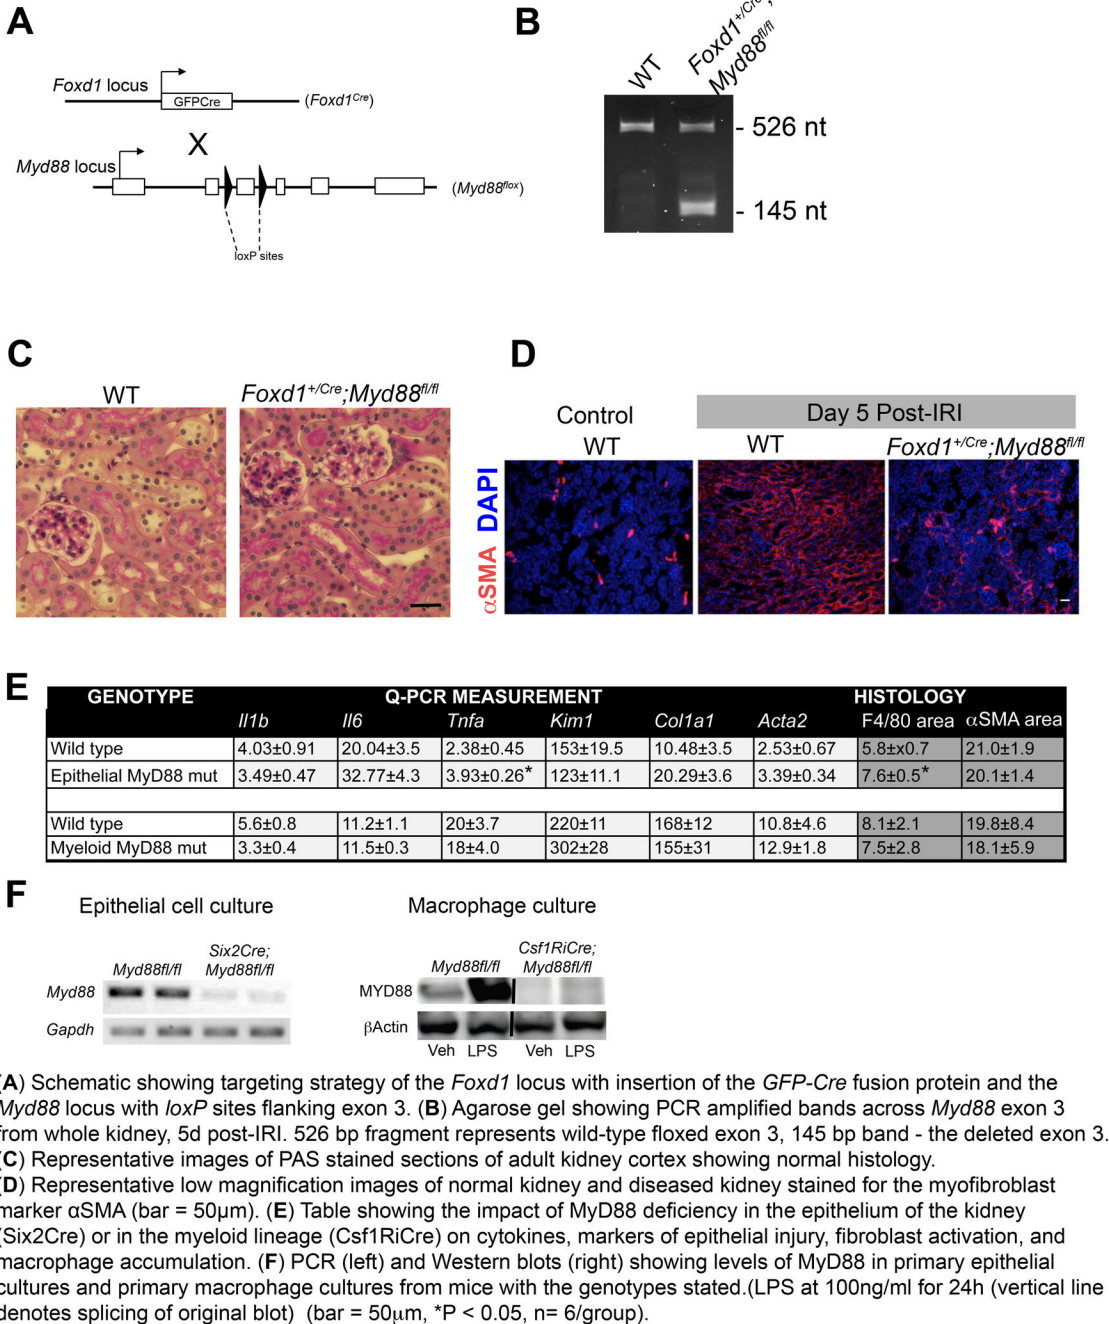

## Supplementary Figure 7

Irak4 expression in the kidney and experiments to test inhibition by BIIB-IRAK4i *in vivo*.

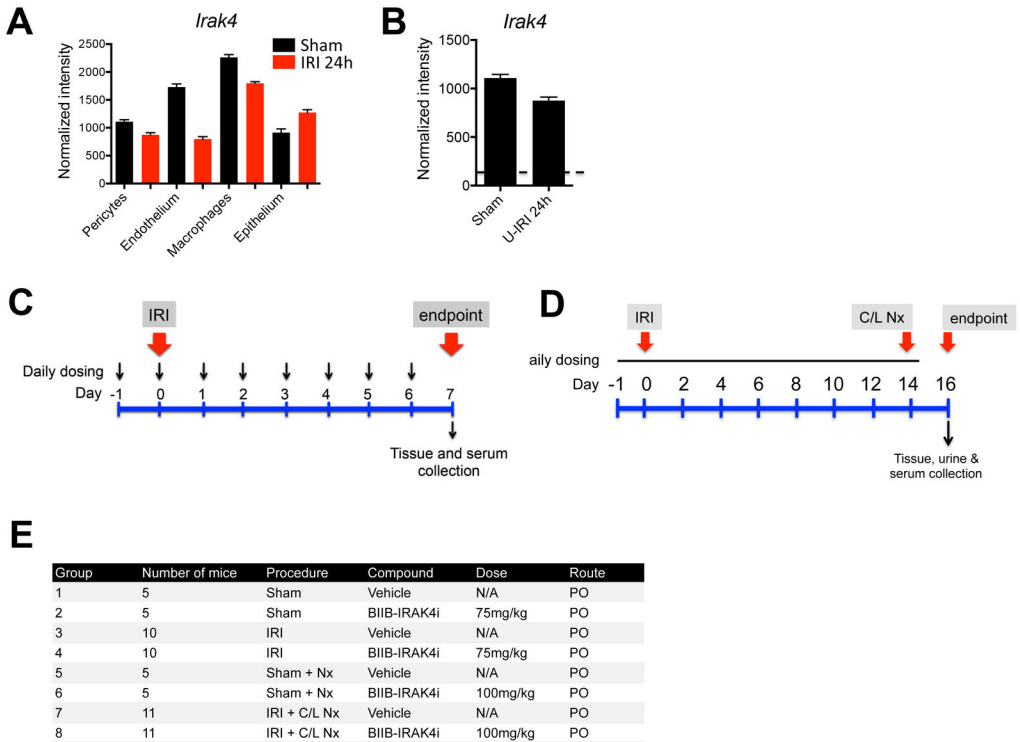

(A-B) *Irak4* expression in pericytes, macrophages, endothelial and epithelial cells from healthy or 24h post-IRI kidneys detected by microarrays using TRAP. (B) Dotted line designates the level of detection. (C-E) *In vivo* study design (contralateral nephrectomy = C/L Nx) and experimental groups (groups 1-4, end point d7, and groups 5-8 end point d16) (n=3-11/group).

# Supplementary Figure 8

## Specificity and potency of the small molecule IRAK4 inhibitor BIIB-IRAK4i

**A**

| ASSAY                             | DESCRIPTION         | BIIB-IRAK4i |
|-----------------------------------|---------------------|-------------|
| IRAK4 biochemical IC50 - 1mM ATP  | Biochemical potency | 1 nM        |
| IRAK1 biochemical IC50 - 10μM ATP | Biochemical potency | 120 nM      |
| IRAK4 Kd                          | Binding             | 0.034 nM    |
| IRAK4 Kd                          | Binding             | 7.9 nM      |

**B**

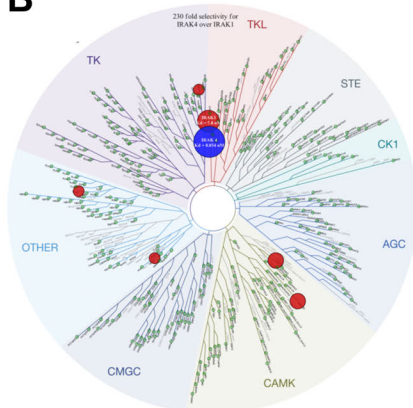

**C**

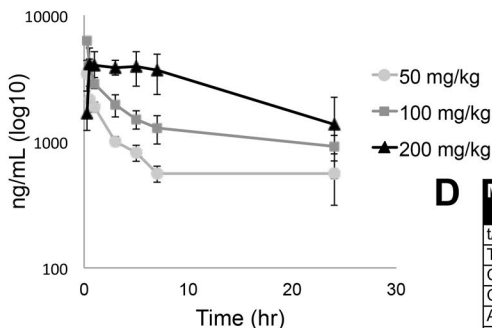

**D**

| MEASUREMENT            | UNITS          | BIIB-IRAK4i DOSE |           |           |
|------------------------|----------------|------------------|-----------|-----------|
|                        |                | 50 mg/ kg        | 100 mg/kg | 200 mg/kg |
| t <sub>1/2</sub>       | hr             | 3.8              | 20.1      | 12.2      |
| T <sub>max</sub>       | hr             | 0.25             | 0.25      | 0.5       |
| C <sub>max</sub>       | ng/mL          | 3423             | 6240      | 4103      |
| C <sub>max_d</sub>     | kg*ng/mL/mg    | 68               | 62        | 21        |
| AUC <sub>clast</sub>   | hr*ng/mL       | 17708            | 33492     | 68818     |
| AUC <sub>clast_D</sub> | hr*kg*ng/mL/mg | 354              | 335       | 344       |

(A) Results of an *in vitro* biochemical assay measuring inhibition of recombinant IRAK4 phosphorylation by BIIB-IRAK4i (IRAK4 was inhibited at an IC<sub>50</sub> of 1nM, IRAK1 was inhibited with an IC<sub>50</sub> 120 fold higher.) and a Biocore binding assay where the K<sub>d</sub> for IRAK4 was 0.034nM but 230 fold higher for IRAK1.

(B) Phylogenetic tree of the human kinome showing 456 kinases that were evaluated using the DiscoverX kinase panel in inhibitory testing for BIIB-IRAK4i. Kinase groups are: TKL (tyrosine kinase like), TK (tyrosine kinase); STE (homologs of yeast sterile 7, 11), CK1 (Casein kinase 1), AGC (containing PKA, PKG, PKC families) CAMK (calcium/calmodulin dependent), CMGC (containing CDK, MAPK, GSK3, CLK families). BIIB-IRAK4i inhibited 7 kinases (shown as circles) by >90% at 1μM (S-Score(10) = 0.02). Circle size represents the amount of inhibition. BIIB-IRAK4i showed the highest inhibition of IRAK4 with a second ranked inhibition of IRAK1.

(C) Plasma concentration of BIIB-IRAK4i in mice given single oral dose of BIIB-IRAK4i as indicated at 50, 100 and 200 mg/ kg... (D) Pharmacokinetic parameters of BIIB-IRAK4i in male C57BL/6 mice following an oral dose of 50, 100, 200 mg/kg. The inhibitor is formulated in 50% PEG/Citric Acid. n=3 mice per group.

Supplementary Figure 9  
Inhibition of disease progression by BIIB-IRAK4i *in vivo*.

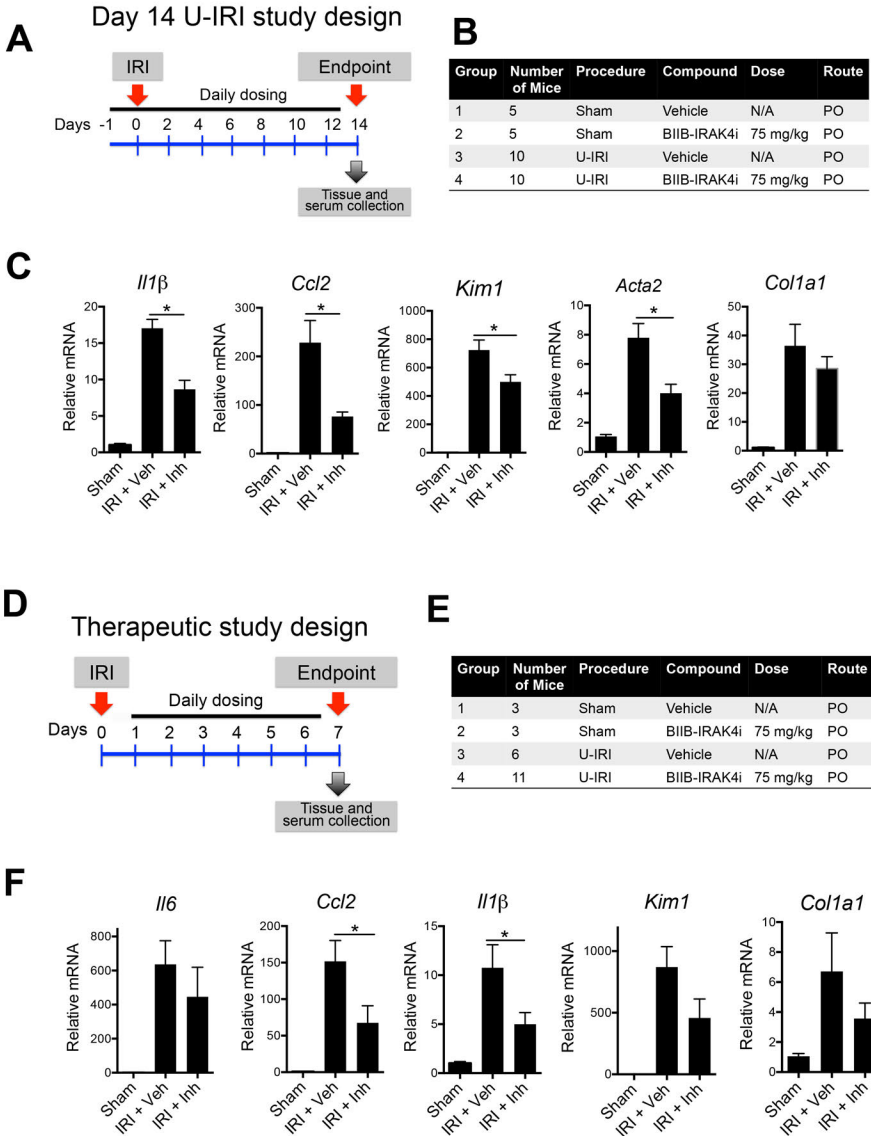

(A) Experimental design for 14-day study of kidney U-IRI. (B) Experimental groups (C) Transcriptional levels of inflammatory (*Ccl2*, *Il1β*), tissue injury (*Kim1*) and fibrotic markers (*Acta2* and *Col1a1*) (D) Experimental design for 7-day U-IRI with therapeutic administration of IRAK4 inhibitor (E) Experimental groups. (F) Transcriptional levels of the inflammatory (*Il6*, *Ccl2*, *Il1β*) tissue injury (*Kim1*), and fibrotic markers (*Col1a1*) (\*  $P < 0.05$ ,  $n=3-11$ /group, 2 tailed Student's t-test or one way ANOVA with Bonferroni's correction).

## Supplemental Table 1

### List of pathways enriched in human acute kidney injury

| Category      | Term                                           | Count | %     | PValue   | Genes                                                                                                                                            | List Total | Pop Hits | Pop Total | Fold Enrichment | Bonferroni | Benjamini | FDR      |
|---------------|------------------------------------------------|-------|-------|----------|--------------------------------------------------------------------------------------------------------------------------------------------------|------------|----------|-----------|-----------------|------------|-----------|----------|
| GOTERM_BP_FAT | GO:0009611-response to wounding                | 22    | 21.57 | 7.50E-13 | NFKBIZ, YWHAZ, CCL2, S100A8, CFB, LY96, CXCL2, S100A9, LYZ, ITGB3, C1S, SOD2, CD163, FOS, C1QB, ITGB6, SERPINA3, TFPI, SERPINA1, VCAN, CFI, PTX3 | 77         | 530      | 13528     | 7.292722        | 8.00E-10   | 8.00E-10  | 1.19E-09 |
| GOTERM_BP_FAT | GO:0006954-inflammatory response               | 18    | 17.65 | 2.07E-12 | NFKBIZ, YWHAZ, CCL2, S100A8, CFB, LY96, CXCL2, S100A9, LYZ, C1S, CD163, FOS, C1QB, ITGB6, SERPINA3, SERPINA1, CFI, PTX3                          | 77         | 325      | 13528     | 9.73043         | 2.20E-09   | 1.10E-09  | 3.29E-09 |
| GOTERM_BP_FAT | GO:0006952-defense response                    | 21    | 20.59 | 1.05E-10 | NFKBIZ, PTPRC, YWHAZ, CCL2, S100A8, CFB, LY96, S100A9, CXCL2, LYZ, C1S, ITGB1, CD163, FOS, C1QB, ITGB6, SERPINA3, MND, SERPINA1, CFI, PTX3       | 77         | 615      | 13528     | 5.999113        | 1.12E-07   | 3.72E-08  | 1.67E-07 |
| GOTERM_BP_FAT | GO:0002526-acute inflammatory response         | 8     | 7.84  | 1.23E-06 | C1QB, YWHAZ, CFB, SERPINA3, SERPINA1, C1S, CFI, CD163                                                                                            | 77         | 98       | 13528     | 14.3419         | 0.001307   | 3.27E-04  | 0.00195  |
| GOTERM_BP_FAT | GO:0006955-immune response                     | 16    | 15.69 | 5.49E-06 | PTPRC, YWHAZ, CCL2, CFB, LY96, CXCL2, C1S, HLA-DQA2, HLA-DQA1, C1QB, FCGR2C, FAS, CFI, FCGR3A, PTX3, FCGR3B                                      | 77         | 690      | 13528     | 4.073932        | 0.005841   | 0.001171  | 0.00875  |
| GOTERM_BP_FAT | GO:0002252-immune effector process             | 8     | 7.84  | 9.90E-06 | C1QB, PTPRC, YWHAZ, CFB, C1S, FAS, CFI, PTX3                                                                                                     | 77         | 134      | 13528     | 10.48885        | 0.010506   | 0.001759  | 0.01577  |
| GOTERM_BP_FAT | GO:0007229-integrin-mediated signaling pathway | 6     | 5.88  | 4.46E-05 | ADAM10, ITGB6, ADAMTS1, ITGB3, ITGB1, ADAM9                                                                                                      | 77         | 70       | 13528     | 15.059          | 0.04647    | 0.006775  | 0.07102  |



## Supplemental Table 2

### List of pathways enriched in myofibroblasts

| Category     | Term                                             | Count | %    | PValue   | Genes                                                                                                                                                                                                                                                            | List Total | Pop Hits | Pop Total | Fold Enrichment | Bonferroni | Benjamini | FDR      |
|--------------|--------------------------------------------------|-------|------|----------|------------------------------------------------------------------------------------------------------------------------------------------------------------------------------------------------------------------------------------------------------------------|------------|----------|-----------|-----------------|------------|-----------|----------|
| KEGG_PATHWAY | mmu03030:DNA replication                         | 23    | 1.04 | 1.53E-12 | LIG1, POLA1, MCM2, MCM3, RNASEH2A, RNASEH2B, MCM5, RNASEH2C, RPA3, MCM6, POLD3, PRIM1, RFC5, RPA2, POLD4, RFC3, POLE4, RFC4, POLE2, RFC2, POLE3, PRIM2, FEN1                                                                                                     | 695        | 35       | 5738      | 5.42545         | 2.71E-10   | 2.71E-10  | 1.88E-09 |
| KEGG_PATHWAY | mmu04110:Cell cycle                              | 40    | 1.8  | 1.80E-08 | DBF4, TGFB3, TTK, CHEK1, SFN, CHEK2, ZBTB17, TGFB1, TGFB2, CCNE2, CCNE1, CDC45, CDKN2C, BUB1, CCNA2, MYC, CDC7, TRP53, CDC6, CDK1, RBL1, YWHAB, SKP2, CDC20, MCM2, CDC26, CDC25C, MCM3, CDC27, CDK2, CDC25A, MCM5, MCM6, CCNB1, CDKN1A, CCNB2, PLK1, BUB1B, ANA  | 695        | 128      | 5738      | 2.58004         | 3.18E-06   | 1.59E-06  | 2.21E-05 |
| KEGG_PATHWAY | mmu00240:Pyrimidine metabolism                   | 31    | 1.4  | 4.44E-07 | POLR2H, POLR2F, POLR2L, DTYMK, POLA1, DCK, CAD, POLR2D, TK1, PRIM1, TYMS, POLE4, POLE2, POLE3, NT5M, PRIM2, UCK2, POLR3K, POLR1D, POLR3GL, POLR3C, POLR3D, POLD3, NME4, NME5, POLD4, RRM2, RRM1, TXNRD2, UCKL1, DUT                                              | 695        | 96       | 5738      | 2.66604         | 7.86E-05   | 2.62E-05  | 5.45E-04 |
| KEGG_PATHWAY | mmu00230:Purine metabolism                       | 41    | 1.85 | 2.31E-06 | ADCY3, POLR2H, POLR2F, GDA, ENPP1, ADCY7, POLR2L, DCK, POLA1, POLR2D, ADA, PRIM1, POLE4, POLE2, PDE1B, NT5M, POLE3, PRIM2, GUCY1A3, ENTPD2, IMPDH1, POLR3K, POLR1D, NUDT5, AK2, AK5, POLR3GL, GMPR, POLR3C, GART, POLR3D, APRT, POLD3, NME4, NME5, POLD4, PDE7B  | 695        | 157      | 5738      | 2.15606         | 4.08E-04   | 1.02E-04  | 0.0028   |
| KEGG_PATHWAY | mmu04623:Cytosolic DNA-sensing pathway           | 19    | 0.86 | 4.58E-05 | IL6, POLR3K, LOC100044068, POLR1D, POLR3GL, IL33, CCL5, POLR3C, AIM2, POLR3D, IFI202B, IKBKE, TMEM173, IRF7, PYCARD, RIPK3, CASP1, ZBP1, ADAR                                                                                                                    | 695        | 55       | 5738      | 2.85211         | 0.0080806  | 0.001621  | 0.0563   |
| KEGG_PATHWAY | mmu04060:Cytokine-cytokine receptor interaction  | 50    | 2.25 | 1.82E-04 | OSMR, IL6ST, LEPR, TGFB3, IL17RA, TGFB1, IL11, TGFB2, CXCR4, CLCF1, CSF2RB, IL13RA1, CSF2RA, CD40, INHBB, INHBA, IFNAR2, CCR5, TNFSF13B, CX3CR1, PDGFRA, NGFR, ACVR1, IL1R2, TNFRSF21, IL1R1, CCL2, CXCL5, CSF2RB2, TNFRSF12A, CSF1, CRLF2, IL4RA, CCL9, CCL8    | 695        | 244      | 5738      | 1.69183         | 0.0316503  | 0.005346  | 0.2229   |
| KEGG_PATHWAY | mmu04062:Chemokine signaling pathway             | 40    | 1.8  | 2.08E-04 | ADCY3, CCL2, ADCY7, CXCL5, BCAR1, CCL9, CCL8, PF4, CX3CL1, CCL5, CCL6, DOCK2, RAC2, CXCR4, GNG2, SHC1, PIK3R5, PLCB1, AKT3, PIK3R2, GNG7, AKT2, NCF1, HCK, PIK3CD, STAT3, PRKCB, HRAS1, CCL17, NRAS, CCL12, GNGT2, CCR5, CXCL14, CX3CR1, GRK6, JAK2, GNB4, RAP1  | 695        | 182      | 5738      | 1.81453         | 0.036086   | 0.005237  | 0.2547   |
| KEGG_PATHWAY | mmu04512:ECM-receptor interaction                | 23    | 1.04 | 2.41E-04 | COL3A1, ITGA4, ITGB3, COL5A3, COL5A2, COL5A1, HMMR, ITGA9, SDC1, CD44, GP1BB, ITGA5, ITGAV, COL6A2, COL1A2, COL1A1, THBS1, THBS2, COL11A1, THBS3, SPP1, THBS4, FN1                                                                                               | 695        | 83       | 5738      | 2.28784         | 0.0417313  | 0.005314  | 0.2954   |
| KEGG_PATHWAY | mmu05221:Acute myeloid leukemia                  | 18    | 0.81 | 2.68E-04 | TCF7, PPARD, PIK3CD, RUNX1T1, PML, LEF1, RPS6KB2, RPS6KB1, STAT3, HRAS1, NRAS, EIF4EBP1, PIK3R5, RUNX1, MYC, AKT3, AKT2, PIK3R2                                                                                                                                  | 695        | 57       | 5738      | 2.60719         | 0.0462796  | 0.005251  | 0.3283   |
| KEGG_PATHWAY | mmu03420:Nucleotide excision repair              | 15    | 0.68 | 3.39E-04 | RAD23B, LIG1, RPA3, POLD3, RFC5, POLD4, XPA, ERCC8, RPA2, POLE4, RFC3, RFC4, POLE2, RFC2, POLE3                                                                                                                                                                  | 695        | 43       | 5738      | 2.88004         | 0.0582855  | 0.005987  | 0.4159   |
| KEGG_PATHWAY | mmu04620:Toll-like receptor signaling pathway    | 25    | 1.13 | 5.45E-04 | TLR1, CCL5, MAP3K7, FOS, MYD88, CASP8, TICAM1, PIK3R5, LBP, AKT3, AKT2, SPP1, PIK3R2, IL6, MAP2K4, PIK3CD, FADD, MAPK11, CD40, IFNAR2, IKBKE, IRF5, MAPK13, IRF7, CD14                                                                                           | 695        | 99       | 5738      | 2.08488         | 0.0920157  | 0.008737  | 0.6676   |
| KEGG_PATHWAY | mmu03430:Mismatch repair                         | 10    | 0.45 | 6.06E-04 | POLD3, RFC5, RPA2, POLD4, RFC3, RFC4, RFC2, LIG1, PMS2, RPA3                                                                                                                                                                                                     | 695        | 22       | 5738      | 3.75278         | 0.1016596  | 0.008894  | 0.7412   |
| KEGG_PATHWAY | mmu03440:Homologous recombination                | 11    | 0.5  | 7.69E-04 | POLD3, RPA2, POLD4, XRCC3, MRE11A, EME1, TOP3A, RAD54B, RAD54L, RAD51, RPA3                                                                                                                                                                                      | 695        | 27       | 5738      | 3.3636          | 0.1272366  | 0.010414  | 0.94     |
| KEGG_PATHWAY | mmu04914:Progesterone-mediated oocyte maturation | 22    | 0.99 | 9.15E-04 | ADCY3, CDK1, ADCY7, PIK3CD, MAPK11, CDC26, CDC25C, CDC27, CDC25A, CDK2, PGR, CCNB1, CCNB2, PLK1, MAPK13, BUB1, PIK3R5, ANAPC7, CCNA2, AKT3, AKT2, PIK3R2                                                                                                         | 695        | 85       | 5738      | 2.13688         | 0.1496295  | 0.011511  | 1.1185   |
| KEGG_PATHWAY | mmu04662:B cell receptor signaling pathway       | 21    | 0.95 | 0.001    | BCL10, PIK3CD, CD72, HRAS1, PRKCB, FOS, NRAS, RAC2, FCGR2B, DAPP1, LILRB3, PPP3CB, PPP3CC, PIK3AP1, PIK3R5, NFATC4, NFATC2, AKT3, AKT2, PIK3R2, NFATC1                                                                                                           | 695        | 80       | 5738      | 2.16723         | 0.1662108  | 0.012045  | 1.2535   |
| KEGG_PATHWAY | mmu04210:Apoptosis                               | 22    | 0.99 | 0.0013   | TRP53, IRAK2, IL1R1, CSF2RB2, PIK3CD, FADD, BIRC3, TRADD, CASP6, MYD88, PRKAR1B, CASP8, PRKAR1A, CASP12, PPP3CB, CSF2RB, PPP3CC, PIK3R5, AKT3, IL3RA, AKT2, PIK3R2                                                                                               | 695        | 87       | 5738      | 2.08775         | 0.2003386  | 0.013876  | 1.5395   |
| KEGG_PATHWAY | mmu03410:Base excision repair                    | 13    | 0.59 | 0.002    | UNG, LIG1, NEIL3, NEIL1, POLD3, POLD4, MPG, POLE4, POLE2, POLE3, PARP3, APEX1, FEN1                                                                                                                                                                              | 695        | 40       | 5738      | 2.68324         | 0.2974776  | 0.020555  | 2.4204   |
| KEGG_PATHWAY | mmu04115:p53 signaling pathway                   | 18    | 0.81 | 0.0028   | TRP53, STEAP3, CDK1, RPRM, CHEK1, CHEK2, SFN, CDK2, CCNE2, CCNB1, CCNE1, CDKN1A, CCNB2, RRM2, SERPINE1, CASP8, GADD45B, THBS1                                                                                                                                    | 695        | 69       | 5738      | 2.15377         | 0.3942314  | 0.027463  | 3.4187   |
| KEGG_PATHWAY | mmu05200:Pathways in cancer                      | 57    | 2.57 | 0.0028   | PPARD, FGF7, MMP9, TGFB3, FGF11, NFKB2, FGF12, GLI2, MMP2, TGFB1, TGFB2, CCNE2, CCNE1, CUL2, FOS, WNT4, CASP8, RALA, MYC, AKT3, CSF2RA, AKT2, PIK3CD, SKP2, RUNX1T1, LEF1, FADD, DAPK3, CDK2, PRKCB, HRAS1, RAD51, PDGFRA, WNT5A, CKS1B, PML, TPMS3, RAC2, ITGAV | 695        | 323      | 5738      | 1.45696         | 0.3962543  | 0.026208  | 3.4411   |
| KEGG_PATHWAY | mmu04370:VEGF signaling pathway                  | 19    | 0.86 | 0.0034   | PIK3CD, SPHK1, MAPKAPK3, MAPK11, SRC, HRAS1, PRKCB, NRAS, RAC2, MAPK13, PPP3CB, PPP3CC, PIK3R5, NFATC4, NFATC2, AKT3, AKT2, PIK3R2, NFATC1                                                                                                                       | 695        | 76       | 5738      | 2.06403         | 0.4551047  | 0.029902  | 4.1259   |
| KEGG_PATHWAY | mmu04350:TGF-beta signaling pathway              | 20    | 0.9  | 0.0069   | RBL1, SMAD5, FST, TGFB3, RPS6KB2, RPS6KB1, SMAD1, TGFB1, TGFB2, INHBB, INHBA, ID3, SMURF1, BMPR1B, THBS1, MYC, THBS2, THBS3, ACVR1, THBS4                                                                                                                        | 695        | 87       | 5738      | 1.89796         | 0.7062682  | 0.056669  | 8.1501   |



Supplemental Table 2 (continued)

|              |                                                      |    |      |        |                                                                                                                                                                                                                                                                 |     |     |      |         |           |          |        |
|--------------|------------------------------------------------------|----|------|--------|-----------------------------------------------------------------------------------------------------------------------------------------------------------------------------------------------------------------------------------------------------------------|-----|-----|------|---------|-----------|----------|--------|
| KEGG_PATHWAY | mmu04510:Focal adhesion                              | 37 | 1.67 | 0.0073 | CAV3, TLN1, BCAR1, COL3A1, ITGB3, SRC, RAC2, ITGAV, COL6A2, SHC1, PIK3R5, ZYX, THBS1, COL11A1, THBS2, THBS3, AKT3, PIK3R2, FN1, SPP1, AKT2, THBS4, PIK3CD, ITGA4, HGF, COL5A3, BIRC3, COL5A2, COL5A1, PRKCB, HRAS1, ITGA9, ITGA5, PDGFRA, COL1A2, RAP1B, COL1A1 | 695 | 198 | 5738 | 1.54281 | 0.7249143 | 0.056979 | 8.5672 |
| KEGG_PATHWAY | mmu04010:MAPK signaling pathway                      | 46 | 2.07 | 0.0104 | IL1R2, IL1R1, FGF7, TGFB3, FGF11, MAPKAPK3, CACNB3, NFKB2, FGF12, SRF, TGFB1, TGFB2, MAP3K7, FOS, RAC2, PPP3CB, PPP3CC, NFATC4, NFATC2, MYC, AKT3, AKT2, TRP53, CACNA2D1, NTF5, CACNG8, PTPN5, MAP2K4, RELB, NR4A1, MAPK11, STK3, PRKCB, HRAS1, NRAS, MAP4K4, D | 695 | 265 | 5738 | 1.43314 | 0.8421952 | 0.07714  | 12.026 |
| KEGG_PATHWAY | mmu04120:Ubiquitin mediated proteolysis              | 27 | 1.22 | 0.0111 | SYVN1, PML, SAE1, UBE2R2, FANCL, ERCC8, CUL2, UBE2D3, MGRN1, UBE2D1, UBE2A, SOCS3, SKP2, UBE2J1, UBE2F, UBE2L6, CDC20, BIRC3, UBE2C, CDC26, UBE2B, CDC27, BRCA1, DET1, SMURF1, ANAPC7, UBE2S                                                                    | 695 | 136 | 5738 | 1.63908 | 0.8614384 | 0.079052 | 12.816 |
| KEGG_PATHWAY | mmu03020:RNA polymerase                              | 9  | 0.41 | 0.0119 | POLR2H, POLR2F, POLR3K, POLR2L, POLR1D, POLR3GL, POLR3C, POLR2D, POLR3D                                                                                                                                                                                         | 695 | 27  | 5738 | 2.75204 | 0.8804629 | 0.081456 | 13.705 |
| KEGG_PATHWAY | mmu04666:Fc gamma R-mediated phagocytosis            | 21 | 0.95 | 0.0122 | PLD2, LIMK2, MARCKSL1, NCF1, HCK, WASF1, PIK3CD, SPHK1, RPS6KB2, RPS6KB1, FCGR1, PRKCB, DOCK2, RAC2, FCGR2B, GAB2, PIK3R5, AKT3, DNM1, AKT2, BRCA1, DET1, SMURF1                                                                                                | 695 | 98  | 5738 | 1.76917 | 0.8854909 | 0.079971 | 13.962 |
| KEGG_PATHWAY | mmu04130:SNARE interactions in vesicular transport   | 11 | 0.5  | 0.0126 | STX6, SNAP29, STX1A, STX2, BNIPI1, BET1, GOSR2, SNAP23, GOSR1, STX11, VTI1A                                                                                                                                                                                     | 695 | 38  | 5738 | 2.38993 | 0.8932155 | 0.079511 | 14.378 |
| KEGG_PATHWAY | mmu00520:Amino sugar and nucleotide sugar metabolism | 12 | 0.54 | 0.0134 | CYB5R3, GMPPB, RENBP, NANS, GFPT1, GNPAT1, GFPT2, PGM1, NPL, HK2, NANP, FMM1                                                                                                                                                                                    | 695 | 44  | 5738 | 2.25167 | 0.9087217 | 0.081942 | 15.306 |
| KEGG_PATHWAY | mmu04630:Jak-STAT signaling pathway                  | 29 | 1.31 | 0.0141 | OSMR, CSF2RB2, IL6ST, LEPR, STAM2, CRLF2, IL4RA, CNTRF, IL11, LIF, CLCF1, CSF2RB, IL2RG, PIK3R5, IL13RA1, MYC, AKT3, CSF2RA, PIK3R2, AKT2, IL6, SOCS2, SOCS3, PIK3CD, STAT3, IFNAR2, JAK2, JAK3, IL3RA                                                          | 695 | 152 | 5738 | 1.57518 | 0.9193343 | 0.083147 | 16.029 |
| KEGG_PATHWAY | mmu04114:Oocyte meiosis                              | 23 | 1.04 | 0.0184 | ADCY3, CDK1, ADCY7, SGOL1, YWHAB, AURKA, CDC20, CDC26, CDC25C, CDC27, CDK2, CCNE2, PGR, CCNB1, CCNE1, CCNB2, PLK1, PPP3CB, BUB1, FBXO5, PPP3CC, ANAPC7, CAMK2A                                                                                                  | 695 | 115 | 5738 | 1.65122 | 0.9627903 | 0.103903 | 20.419 |
| KEGG_PATHWAY | mmu04310:Wnt signaling pathway                       | 28 | 1.26 | 0.0193 | WNT5A, NKD1, PPARD, NKD2, MMP7, MAP3K7, WNT4, CSNK2A1, RAC2, PPP3CB, PPP3CC, NFATC4, PLCB1, NFATC2, CAMK2A, MYC, FOXL1, NFATC1, TRP53, TCF7, LEF1, FZD3, PRKCB, DKK2, CTNBP1, SFRP1, CSNK1E, LRP5                                                               | 695 | 149 | 5738 | 1.55148 | 0.9684143 | 0.105467 | 21.319 |
| KEGG_PATHWAY | mmu05410:Hypertrophic cardiomyopathy (HCM)           | 18 | 0.81 | 0.0215 | CACNA2D1, IL6, ACT1C, CACNG8, PRKAG2, LMNA, TGFB3, CACNB3, ITGA4, ITGB3, TPM2, TPM1, TGFB1, TPM3, TGFB2, ITGA9, ITGA5, ITGAV                                                                                                                                    | 695 | 84  | 5738 | 1.76917 | 0.9785393 | 0.113122 | 23.401 |
| KEGG_PATHWAY | mmu05210:Colorectal cancer                           | 18 | 0.81 | 0.0266 | TRP53, TCF7, PIK3CD, TGFB3, LEF1, FZD3, BIRC5, TGFB1, RALGDS, TGFB2, FOS, RAC2, PDGFRA, PIK3R5, MYC, AKT3, AKT2, PIK3R2                                                                                                                                         | 695 | 86  | 5738 | 1.72802 | 0.9915369 | 0.134638 | 28.191 |
| KEGG_PATHWAY | mmu04012:ErbB signaling pathway                      | 18 | 0.81 | 0.0295 | MAP2K4, PIK3CD, RPS6KB2, RPS6KB1, SRC, HRAS1, PRKCB, NRAS, EIF4EBP1, CDKN1A, EREG, PIK3R5, SHC1, MYC, CAMK2A, AKT3, AKT2, PIK3R2                                                                                                                                | 695 | 87  | 5738 | 1.70816 | 0.9949969 | 0.144282 | 30.763 |
| KEGG_PATHWAY | mmu04621:NOD-like receptor signaling pathway         | 14 | 0.63 | 0.0317 | IL6, CCL2, CCL8, MAPK11, BIRC3, CCL5, MAP3K7, CCL12, MAPK13, CASP8, PSTPIP1, PYCARD, RIPK2, CASP1                                                                                                                                                               | 695 | 62  | 5738 | 1.86428 | 0.9966728 | 0.150424 | 32.695 |
| KEGG_PATHWAY | mmu05220:Chronic myeloid leukemia                    | 16 | 0.72 | 0.0363 | TRP53, PIK3CD, TGFB3, TGFB1, TGFB2, HRAS1, NRAS, CDKN1A, GAB2, PIK3R5, SHC1, RUNX1, MYC, AKT3, AKT2, PIK3R2                                                                                                                                                     | 695 | 76  | 5738 | 1.73813 | 0.9985696 | 0.166347 | 36.525 |
| KEGG_PATHWAY | mmu04640:Hematopoietic cell lineage                  | 17 | 0.77 | 0.042  | IL1R2, IL6, IL1R1, CSF1, IL4RA, ITGB3, ITGA4, CD1D1, FCGR1, KITL, IL11, CD44, GP1BB, ITGA5, CSF2RA, IL3RA, CD14                                                                                                                                                 | 695 | 84  | 5738 | 1.67088 | 0.9994966 | 0.185553 | 40.962 |
| KEGG_PATHWAY | mmu05414:Dilated cardiomyopathy                      | 18 | 0.81 | 0.0475 | ADCY3, CACNA2D1, ACT1C, ADCY7, CACNG8, LMNA, TGFB3, CACNB3, ITGB3, ITGA4, TPM2, TPM1, TGFB1, TGFB2, TPM3, ITGA9, ITGA5, ITGAV                                                                                                                                   | 695 | 92  | 5738 | 1.61533 | 0.9998183 | 0.202815 | 44.994 |
| KEGG_PATHWAY | mmu04540:Gap junction                                | 17 | 0.77 | 0.0507 | ADCY3, CDK1, ADCY7, PRKG2, SRC, PRKCB, HRAS1, NRAS, CSNK1D, TUBB5, PDGFRA, TUBB6, GUCY1A3, GUCY1B3, HTR2B, PLCB1, TUBB3                                                                                                                                         | 695 | 86  | 5738 | 1.63202 | 0.9998992 | 0.210189 | 47.197 |
| KEGG_PATHWAY | mmu05219:Bladder cancer                              | 10 | 0.45 | 0.06   | TRP53, NRAS, CDKN1A, MMP9, RASSF1, THBS1, DAPK3, MYC, MMP2, HRAS1                                                                                                                                                                                               | 695 | 42  | 5738 | 1.96574 | 0.9999823 | 0.23935  | 53.206 |
| KEGG_PATHWAY | mmu04142:Lysosome                                    | 21 | 0.95 | 0.0778 | AP1M1, NAGLU, GM2A, GUSB, AP3S2, AP3S1, CTSS, SLC11A2, SLC11A1, CTSK, CD68, LAPTM5, AP1S2, GLA, CTSE, ATP6V0A1, CTSC, SCARB2, MAN2B1, GBA, IDUA                                                                                                                 | 695 | 119 | 5738 | 1.45696 | 0.9999994 | 0.294998 | 63.011 |
| KEGG_PATHWAY | mmu05214:Glioma                                      | 13 | 0.59 | 0.0793 | TRP53, PIK3CD, PRKCB, HRAS1, NRAS, CDKN1A, PDGFRA, PIK3R5, SHC1, CAMK2A, AKT3, PIK3R2, AKT2                                                                                                                                                                     | 695 | 64  | 5738 | 1.67702 | 0.9999996 | 0.294001 | 63.748 |
| KEGG_PATHWAY | mmu05218:Melanoma                                    | 14 | 0.63 | 0.0812 | TRP53, FGF7, PIK3CD, FGF11, HGF, FGF12, HRAS1, NRAS, CDKN1A, PDGFRA, PIK3R5, AKT3, PIK3R2, AKT2                                                                                                                                                                 | 695 | 71  | 5738 | 1.62797 | 0.9999997 | 0.294432 | 64.678 |
| KEGG_PATHWAY | mmu05222:Small cell lung cancer                      | 16 | 0.72 | 0.0835 | TRP53, CKS1B, PIK3CD, SKP2, BIRC3, CDK2, CCNE2, CCNE1, ITGAV, PIK3R5, TRAF5, MYC, AKT3, AKT2, PIK3R2, FN1                                                                                                                                                       | 695 | 85  | 5738 | 1.55409 | 0.9999998 | 0.295712 | 65.713 |
| KEGG_PATHWAY | mmu05212:Pancreatic cancer                           | 14 | 0.63 | 0.0887 | TRP53, PIK3CD, TGFB3, RALGDS, STAT3, TGFB1, TGFB2, RAD51, RAC2, RALA, PIK3R5, AKT3, AKT2, PIK3R2                                                                                                                                                                | 695 | 72  | 5738 | 1.60536 | 0.9999999 | 0.306153 | 68.062 |
| KEGG_PATHWAY | mmu05213:Endometrial cancer                          | 11 | 0.5  | 0.0904 | TRP53, NRAS, TCF7, PIK3CD, LEF1, PIK3R5, MYC, AKT3, AKT2, PIK3R2, HRAS1                                                                                                                                                                                         | 695 | 52  | 5738 | 1.74649 | 0.9999999 | 0.305617 | 68.785 |
| KEGG_PATHWAY | mmu04650:Natural killer cell mediated cytotoxicity   | 21 | 0.95 | 0.095  | ITGB2, RAET1B, RAET1A, RAET1C, RAET1D, RAET1E, RAC2, PPP3CB, PPP3CC, FCER1G, NFATC4, SHC1, PIK3R5, NFATC2, NFATC1, TYROBP, PIK3R2, PIK3CD, FCGR4, FCGR3, PRKCB, HRAS1, NRAS, IFNAR2, SH3BP2                                                                     | 695 | 122 | 5738 | 1.42113 | 1         | 0.313359 | 70.658 |

**Supplemental Table 3****List of Taqman Gene Expression Assays used for transcript quantification**

| <b>Gene</b>   | <b>Vendor</b>     | <b>Format</b>                  | <b>Assay ID</b> |
|---------------|-------------------|--------------------------------|-----------------|
| <i>Acta2</i>  | Life Technologies | TaqMan® Gene Expression Assays | Mm00725412_s1   |
| <i>Ccl2</i>   | Life Technologies | TaqMan® Gene Expression Assays | Mm00441242_m1   |
| <i>Ccl3</i>   | Life Technologies | TaqMan® Gene Expression Assays | Mm00441259_g1   |
| <i>Cd80</i>   | Life Technologies | TaqMan® Gene Expression Assays | Mm00711660_m1   |
| <i>Col1a1</i> | Life Technologies | TaqMan® Gene Expression Assays | Mm00801666_g1   |
| <i>Cxcl1</i>  | Life Technologies | TaqMan® Gene Expression Assays | Mm04207460_m1   |
| <i>Cxcl10</i> | Life Technologies | TaqMan® Gene Expression Assays | Mm00445235_m1   |
| <i>Cxcl2</i>  | Life Technologies | TaqMan® Gene Expression Assays | Mm00436450_m1   |
| <i>Gapdh</i>  | Life Technologies | TaqMan® Gene Expression Assays | Mm99999915_g1   |
| <i>Icam1</i>  | Life Technologies | TaqMan® Gene Expression Assays | Mm00516023_m1   |
| <i>Il18</i>   | Life Technologies | TaqMan® Gene Expression Assays | Mm00434225_m1   |
| <i>Il1r1</i>  | Life Technologies | TaqMan® Gene Expression Assays | Mm00434237_m1   |
| <i>Il1β</i>   | Life Technologies | TaqMan® Gene Expression Assays | Mm00434228_m1   |
| <i>Il6</i>    | Life Technologies | TaqMan® Gene Expression Assays | Mm00446190_m1   |
| <i>Irak4</i>  | Life Technologies | TaqMan® Gene Expression Assays | Mm00459443_m1   |
| <i>Myd88</i>  | Life Technologies | TaqMan® Gene Expression Assays | Mm00440338_m1   |
| <i>Tlr2</i>   | Life Technologies | TaqMan® Gene Expression Assays | Mm01213946_g1   |
| <i>Tlr4</i>   | Life Technologies | TaqMan® Gene Expression Assays | Mm00445273_m1   |
| <i>Tnfa</i>   | Life Technologies | TaqMan® Gene Expression Assays | Mm00443258_m1   |
| <i>Vcam1</i>  | Life Technologies | TaqMan® Gene Expression Assays | Mm01320970_m1   |
| <i>ACTA2</i>  | Life Technologies | TaqMan® Gene Expression Assays | Hs00426835_g1   |
| <i>CCL2</i>   | Life Technologies | TaqMan® Gene Expression Assays | Hs00234140_m1   |
| <i>CCL3</i>   | Life Technologies | TaqMan® Gene Expression Assays | Hs04194942_s1   |
| <i>COL1A1</i> | Life Technologies | TaqMan® Gene Expression Assays | Hs00164004_m1   |
| <i>CXCL1</i>  | Life Technologies | TaqMan® Gene Expression Assays | Hs00236937_m1   |
| <i>CXCL10</i> | Life Technologies | TaqMan® Gene Expression Assays | Hs01124251_g1   |
| <i>CXCL2</i>  | Life Technologies | TaqMan® Gene Expression Assays | Hs00601975_m1   |
| <i>GAPDH</i>  | Life Technologies | TaqMan® Gene Expression Assays | Hs02758991_g1   |
| <i>ICAM1</i>  | Life Technologies | TaqMan® Gene Expression Assays | Hs00164932_m1   |
| <i>IL1B</i>   | Life Technologies | TaqMan® Gene Expression Assays | Hs01555410_m1   |
| <i>IL1R1</i>  | Life Technologies | TaqMan® Gene Expression Assays | Hs00991010_m1   |
| <i>IL6</i>    | Life Technologies | TaqMan® Gene Expression Assays | Hs00985639_m1   |
| <i>MYD88</i>  | Life Technologies | TaqMan® Gene Expression Assays | Hs01573837_g1   |
| <i>TLR4</i>   | Life Technologies | TaqMan® Gene Expression Assays | Hs00152939_m1   |
| <i>TNFA</i>   | Life Technologies | TaqMan® Gene Expression Assays | Hs01113624_g1   |
| <i>VCAM1</i>  | Life Technologies | TaqMan® Gene Expression Assays | Hs01003372_m1   |

**Supplemental Table 4**  
**List of siRNAs**

| <b>Gene</b>  | <b>Vendor</b> | <b>Catalog No.</b> | <b>siRNA ID</b> |
|--------------|---------------|--------------------|-----------------|
| <i>Il1r1</i> | Thermo Fisher | AM16708            | 158285          |
| <i>Irak4</i> | Thermo Fisher | AM16708            | 152514          |
| <i>Myd88</i> | Thermo Fisher | 4390771            | s201719         |
| <i>Tlr2</i>  | Thermo Fisher | AM16708            | 187990          |
| <i>Tlr4</i>  | Thermo Fisher | 188776             | AM16708         |
| <i>IL1R1</i> | Thermo Fisher | AM16708            | 106303          |
| <i>IRAK4</i> | Thermo Fisher | AM16708            | 134831          |
| <i>MYD88</i> | Thermo Fisher | 4390824            | s9137           |

Full unedited gels for Figure 1 H

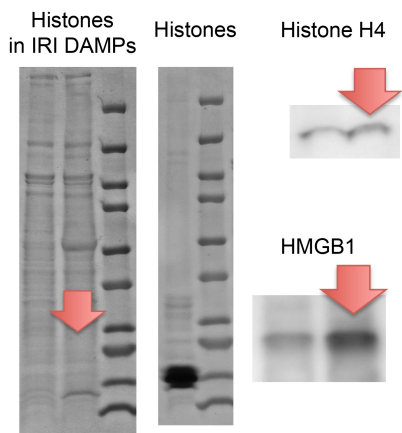

Full unedited gels for Figure 2C

Available gels for Figure 2B

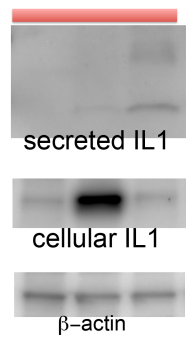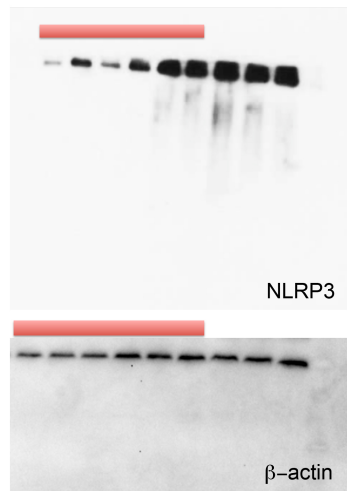

Full unedited gels for Figure S5 D

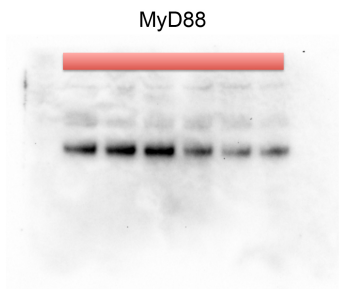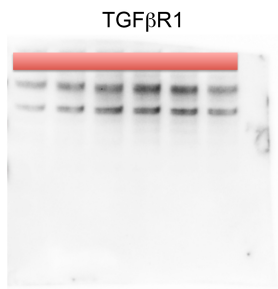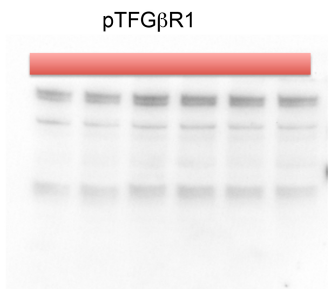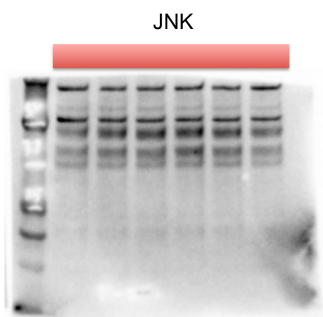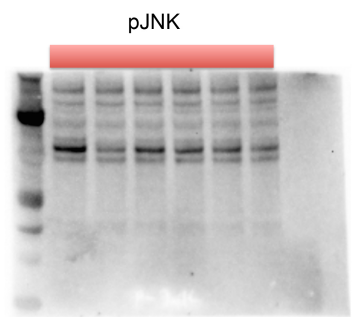

Full unedited gel for figure S6 B

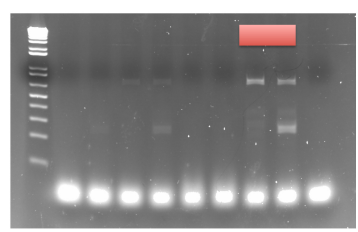

Available gels for figure S6F

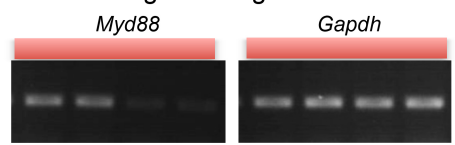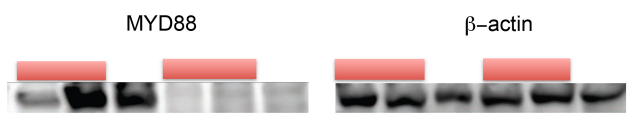

Supplement: sd1 [file 1]
